# Supplementary material
Source: Springer Nature journal article supplement (https://www.springermedizin.de/resource/supplementary/12887_2007_182_MOESM1_ESM.pdf/9477560)
Supplement: MOESM1 [file 9477560]

**Total number of children  
admitted over 2 years  
9,960**

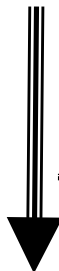

**Excluded**

Epilepsy – 190  
Not assessed for seizures – 126  
Residence status unknown - 36

**From outside the study area  
- 3,745**

**Children from the study area  
5,863**

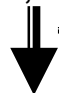

**Excluded**

Re-admissions, n=942(16.1%)

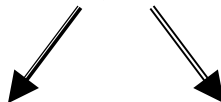

**Admissions with incident  
seizures N=900, (18.3%)**

**Incident non-seizure  
admissions, n=4,021**
